# Supplementary material for: RNA Interference and Single Particle Tracking Analysis of Hepatitis C Virus Endocytosis
Source: PubMed Central journal article supplement (PMC2790617; doi:10.1371/journal.ppat.1000702), 2009-12-24

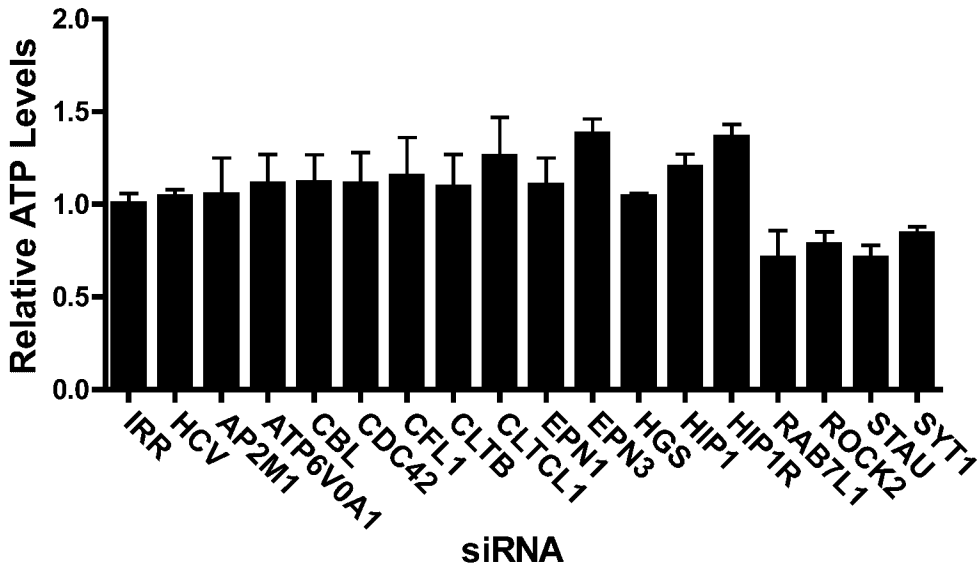

Supplement: ppat.1000702.s001.pdf [file ppat.1000702.s001.pdf]
