# Supplementary material for: RNA Interference and Single Particle Tracking Analysis of Hepatitis C Virus Endocytosis
Source: PLOS journal article supplement (doi:10.1371/journal.ppat.1000702), 2009-12-23
Supplement: S2 (10.1371/journal.ppat.1000702.s002) [file journal.ppat.1000702.s002]

**SI Table 1. Genes and siRNAs tested in RNA interference screen.**

| Gene   | GenBank Accession No. | Pooled siRNAs                                                                             | Individual siRNAs                                         |                                                                                          |
|--------|-----------------------|-------------------------------------------------------------------------------------------|-----------------------------------------------------------|------------------------------------------------------------------------------------------|
|        |                       | siGENOME SMARTpool (Primary Screen)                                                       | Catalog No.                                               | Sequence                                                                                 |
| CLTCL1 | NM_001835             | GCAAAGUGAUCCAGUGUUU<br>CCGAGUGGCUUGUCAAUUU<br>CAGCCGACCUGCCUAAUGA<br>GAUUGGAGCUAAACAUGGU  | D-011611-04 <sup>a</sup><br>D-011611-17*                  | GAUUGGAGCUAAACAUGGU<br>CGCCAAAGUUGCAGCGUCU                                               |
| CLTB   | NM_001834             | GCGCCAGAGUGAACAAGUA<br>GAAGGUGGCCAGCUAUGU<br>GGAACCAGCGCCAGAGUGA<br>GAGCGAGAUUGCAGGCAUA   | D-004003-03<br>D-004003-04                                | GGAACCAGCGCCAGAGUGA<br>GAGCGAGAUUGCAGGCAUA                                               |
| HIP1R  | NM_003959             | CAGCUAACUCGUGAACUA<br>CUGUGGAGAUGUUUGAUUA<br>CCUCUUCGAUCAGACGUUU<br>CCGACAUGCUGUACUUCAA   | D-027079-03<br>D-027079-04                                | CCUCUUCGAUCAGACGUUU<br>CCGACAUGCUGUACUUCAA                                               |
| HIP1   | NM_005338             | GGAAGUGGCUGUAAAAGGAA<br>GAACCAAGAUGGAGUACCA<br>GCAAUUCACAGAUCGAAGA<br>CUAAUGGUGUGUUCUCAUG | D-005001-01<br>D-005001-04                                | GGAAGUGGCUGUAAAAGGAA<br>GAACCAAGAUGGAGUACCA                                              |
| EPN1   | NM_013333             | GGAAGACGCCGGAGUCAUU<br>GAACUGGCGUCACGUUUAC<br>GGACCUUGCUGACGUCUUC<br>GAACGUGCGUGAGAAAGCU  | D-004724-01<br>D-004724-02<br>D-004724-03<br>D-004724-04  | GGAAGACGCCGGAGUCAUU<br>GAACUGGCGUCACGUUUAC<br>GGACCUUGCUGACGUCUUC<br>GAACGUGCGUGAGAAAGCU |
| EPN3   | NM_017957             | GCGAGAACCUCUACACCAU<br>UAACAUUGCUGGACUACCU<br>UCGUGACCUGACCUUCAA<br>UGCCAAACCUCAGAAUCC    | D-021006-04<br>132202 <sup>b</sup><br>132200 <sup>b</sup> | UGCCAAACCUCAGAAUCC<br>GCAAAAUGGCACGAAGGAG<br>CGUGUACAAGGCUCUACAA                         |
| CFL1   | NM_005507             | UGACAGGGAUCAAGCAUGA<br>GCGGUGCUCUUCUGCCUGA<br>GUCAAGAUGCUGCCAGAU<br>GCUAUGCCCUCUAUGAUGC   | D-012707-01<br>D-012707-03<br>D-012707-04                 | UGACAGGGAUCAAGCAUGA<br>GUCAAGAUGCUGCCAGAU<br>GCUAUGCCCUCUAUGAUGC                         |
| CDC42  | NM_001791             | GGAGAACCAUAUACUCUUG<br>GAUUACGACCGCUGAGUUA<br>GAUGACCCCUCUACUAUUG<br>CGGAAUAUGUACCGACUGU  | D-005057-01<br>D-005057-02<br>D-005057-03<br>D-005057-04  | GGAGAACCAUAUACUCUUG<br>GAUUACGACCGCUGAGUUA<br>GAUGACCCCUCUACUAUUG<br>CGGAAUAUGUACCGACUGU |
| ROCK2  | NM_004850             | GAGGAAAGCUGAUCAUGAA<br>GUAGAAACCUUCCAAUUC<br>GCAACUGGCUCGUUCAAU<br>GCAAUCUGUUAUACUCG      | D-004610-02<br>D-004610-03<br>D-004610-05<br>D-004610-18* | GUAGAAACCUUCCAAUUC<br>GCAACUGGCUCGUUCAAU<br>GCAAUCUGUUAUACUCG<br>GCAGCAAUGGUAAGCGUAA     |
| AP2M1  | NM_004068             | UAUAUGAGCUGCUGGAUGA<br>GAAGAGCAGUCACAGAUA<br>CGUGAUGGCUGCCUACUUU<br>GGAGGCUUAUUCUAUAUA    | D-008170-01<br>D-008170-02<br>D-008170-04                 | UAUAUGAGCUGCUGGAUGA<br>GAAGAGCAGUCACAGAUA<br>GGAGGCUUAUUCUAUAUA                          |
| SYT1   | NM_005639             | GCAAUUUACUUUCAAGGUA<br>GUAAGAGGCUGAAGAAGAA<br>GAUCGUUUCUCUAAGCAUG<br>CGACUGUUCUGCCAAGCAA  | D-020044-01<br>D-020044-02<br>D-020044-03                 | GCAAUUUACUUUCAAGGUA<br>GUAAGAGGCUGAAGAAGAA<br>GAUCGUUUCUCUAAGCAUG                        |
| CBL    | NM_005188             | GGAGACACAUUUCGGAUUA                                                                       | s2477 <sup>b</sup>                                        | GAUUGAUAGCUGUACGUUA                                                                      |

|          |           |                                                                                           |                                                          |                                                                                           |
|----------|-----------|-------------------------------------------------------------------------------------------|----------------------------------------------------------|-------------------------------------------------------------------------------------------|
|          |           | GAUCUGACCUGCAAUGAUU<br>GACAAUCCCUCACAAUAAA<br>CCAGAAAGCUUUGGUCAUU                         | 121529 <sup>b</sup>                                      | CCUUAUAUCUUAGACCUGCC                                                                      |
| HGS      | NM_004712 | GCACGUCUUUCCAGAAUUC<br>AGAGAGCGAUGCCAUGUUU<br>GAUUAUCUGUGGAAAGUGU<br>GUAACGUCCGUAACAAGA   | 137616 <sup>b</sup><br>103410 <sup>b</sup>               | CGACAAGAACCCACACGUC<br>GGACCUGCUGAAGAGACAA                                                |
| ATP6V0A1 | NM_005177 | GAAGAUGUCUGUUAUCCUU<br>GGAAGAGGCACUCCUUUAA<br>CCAAUAAACUGACGUUCUU                         | D-017618-01<br>D-017618-04                               | GAAGAUGUCUGUUAUCCUU<br>GAACUUACCGAGAGAUAAA                                                |
| STAU     | NM_004602 | AAACGGAACUUGCCUGUGA<br>GAACGAAUUUGUAUCUCUU<br>GCAAUUUAAUGGCAAAGGA<br>CACGGUAAACUGCCAUGAUA | D-011894-02<br>D-011894-03                               | GAACGAAUUUGUAUCUCUU<br>GCAAUUUAAUGGCAAAGGA                                                |
| RAB7L1   | NM_003929 | CAGAUUGACCGGUUCAGUA<br>GAGAACGGUUUCACAGGUU<br>GGGACUACAUCAAAUCUACA<br>CAACAAGUGUGAUCUGUCC | D-010556-01<br>D-010556-03<br>D-010556-05<br>D-010556-06 | CAGAUUGACCGGUUCAGUA<br>GAGAACGGUUUCACAGGUU<br>GGGACUACAUCAAAUCUACA<br>CAACAAGUGUGAUCUGUCC |
| ACACA    | NM_198834 |                                                                                           | M-004551-02 <sup>a</sup>                                 |                                                                                           |
| ACTR2    | NM_005722 |                                                                                           | M-012076-00                                              |                                                                                           |
| ACTR3    | NM_005721 |                                                                                           | M-012077-01                                              |                                                                                           |
| ADAM10   | NM_001110 |                                                                                           | M-004503-01                                              |                                                                                           |
| AMPH     | NM_001635 |                                                                                           | M-011569-00                                              |                                                                                           |
| AP1B1    | NM_001127 |                                                                                           | M-011200-00                                              |                                                                                           |
| AP1M1    | NM_032493 |                                                                                           | M-013196-00                                              |                                                                                           |
| AP1M2    | NM_005498 |                                                                                           | M-012056-00                                              |                                                                                           |
| AP2A1    | NM_014203 |                                                                                           | M-012492-00                                              |                                                                                           |
| AP2A2    | NM_012305 |                                                                                           | M-012812-00                                              |                                                                                           |
| AP2B1    | NM_001282 |                                                                                           | M-003627-01                                              |                                                                                           |
| ARF1     | NM_001658 |                                                                                           | M-011580-00                                              |                                                                                           |
| ARF3     | NM_001659 |                                                                                           | M-011581-00                                              |                                                                                           |
| ARF5     | NM_001662 |                                                                                           | M-011584-00                                              |                                                                                           |
| ARF6     | NM_001663 |                                                                                           | M-004008-00                                              |                                                                                           |
| ARFIP2   | NM_012402 |                                                                                           | M-012820-00                                              |                                                                                           |
| ARPC1B   | NM_005720 |                                                                                           | M-012082-01                                              |                                                                                           |
| ARPC2    | NM_005731 |                                                                                           | M-012081-00                                              |                                                                                           |
| ARPC3    | NM_005719 |                                                                                           | M-005284-00                                              |                                                                                           |
| ARPC4    | NM_005718 |                                                                                           | M-008571-00                                              |                                                                                           |
| ARPC5    | NM_005717 |                                                                                           | M-012080-00                                              |                                                                                           |
| ARRB1    | NM_004041 |                                                                                           | M-011971-00                                              |                                                                                           |
| ARRB2    | NM_004313 |                                                                                           | M-007292-00                                              |                                                                                           |
| ATG5     | NM_004849 |                                                                                           | M-004374-03                                              |                                                                                           |
| ATG12    | NM_004707 |                                                                                           | M-010212-02                                              |                                                                                           |
| ATM      | NM_138293 |                                                                                           | M-003201-02                                              |                                                                                           |
| BIN1     | NM_004305 |                                                                                           | M-008246-00                                              |                                                                                           |
| CAMK1    | NM_003656 |                                                                                           | M-004940-00                                              |                                                                                           |
| CAV1     | NM_001753 |                                                                                           | M-003467-01                                              |                                                                                           |
| CAV2     | NM_001233 |                                                                                           | M-010958-00                                              |                                                                                           |
| CAV3     | NM_001234 |                                                                                           | M-011229-00                                              |                                                                                           |

|          |           |             |
|----------|-----------|-------------|
| CBLB     | NM_170662 | M-003004-01 |
| CIB1     | NM_006384 | M-012261-00 |
| CIB2     | NM_006383 | M-012230-00 |
| CIB3     | NM_054113 | M-012901-00 |
| CLTA     | NM_001833 | M-004002-00 |
| CLTC     | NM_004859 | M-004001-00 |
| COPA     | NM_004371 | M-011835-00 |
| COPB2    | NM_004766 | M-019847-01 |
| CTBP1    | NM_001328 | M-008609-01 |
| DAB2     | NM_001343 | M-008522-00 |
| DDEF2    | NM_003887 | M-011544-00 |
| DIAPH1   | NM_005219 | M-010347-01 |
| DNM1     | NM_004408 | M-003940-00 |
| DNM2     | NM_004945 | M-004007-01 |
| DNM3     | NM_015569 | M-013931-00 |
| EEA1     | NM_003566 | M-004012-01 |
| EFS      | NM_005864 | M-012094-00 |
| ELKS     | NM_015064 | M-010942-00 |
| ENTH     | NM_014666 | M-021406-00 |
| EPN2     | NM_148921 | M-004725-00 |
| EPS15    | NM_001981 | M-004005-00 |
| EPS15L1  | NM_021235 | M-004006-00 |
| FASN     | NM_004104 | M-003954-04 |
| FYN      | NM_002037 | M-003140-03 |
| GAF1     | NM_015470 | M-004298-00 |
| GIT1     | NM_014030 | M-004298-00 |
| GNB2L1   | NM_006098 | M-006876-00 |
| GORASP1  | NM_031899 | M-013510-00 |
| GRB2     | NM_002086 | M-019220-00 |
| IHPK3    | NM_054111 | M-006739-00 |
| ITSN1    | NM_003024 | M-008365-00 |
| ITSN2    | NM_006277 | M-009841-00 |
| LIMK1    | NM_002314 | M-007730-01 |
| MAP4K2   | NM_004579 | M-003587-01 |
| MAPK8IP1 | NM_005456 | M-003595-00 |
| MAPK8IP2 | NM_012324 | M-012462-00 |
| MAPK8IP3 | NM_015133 | M-003596-01 |
| NEDD4    | NM_006154 | M-007178-01 |
| NEDD4L   | NM_015277 | M-007187-01 |
| NSF      | NM_006178 | M-009401-00 |
| PACSIN1  | NM_020804 | M-007735-00 |
| PACSIN3  | NM_016223 | M-015343-00 |
| PAK1     | NM_002576 | M-003521-03 |
| PICALM   | NM_007166 | M-004004-02 |
| PIK3C2G  | NM_004570 | M-006773-00 |
| PIK3CG   | NM_002649 | M-005274-02 |
| PIK4CA   | NM_002650 | M-006776-03 |
| PIK4CB   | NM_002651 | M-006777-02 |
| PIP5K1A  | NM_003557 | M-004780-02 |
| PITPNM1  | NM_004910 | M-019888-00 |

|         |           |             |
|---------|-----------|-------------|
| PRKCM   | NM_002742 | M-005028-00 |
| PSCD3   | NM_004227 | M-019268-00 |
| RAB11A  | NM_004663 | M-004726-02 |
| RAB11B  | NM_004218 | M-004727-01 |
| RAB3A   | NM_002866 | M-009668-01 |
| RAB3B   | NM_002867 | M-008825-00 |
| RAB3C   | NM_138453 | M-008520-00 |
| RAB3D   | NM_004283 | M-010822-01 |
| RAB4A   | NM_004578 | M-008539-01 |
| RAB4B   | NM_016154 | M-008780-01 |
| RAB5A   | NM_004162 | M-004009-00 |
| RAB5B   | NM_002868 | M-004010-01 |
| RAB5C   | NM_004583 | M-004011-01 |
| RAB6A   | NM_002869 | M-008975-01 |
| RAB6B   | NM_016577 | M-008548-00 |
| RAB7B   | NM_177403 | M-018225-00 |
| RAB8A   | NM_005370 | M-003905-00 |
| RAB8B   | NM_016530 | M-008744-00 |
| RAC1    | NM_018890 | M-003560-02 |
| RHOA    | NM_001664 | M-003860-00 |
| ROCK1   | NM_005406 | M-003536-01 |
| SARA1   | NM_020150 | M-016756-00 |
| SH3GLB1 | NM_016009 | M-017086-00 |
| SH3GLB2 | NM_020145 | M-015810-00 |
| SNAP91  | NM_014841 | M-032296-00 |
| SREBF1  | NM_004176 | M-006891-00 |
| SYNJ2   | NM_003898 | M-012624-00 |
| SYT2    | NM_177402 | M-018809-00 |
| TNIK    | XM_039796 | M-004542-02 |
| VAMP1   | NM_014231 | M-012497-00 |
| VAMP2   | NM_014232 | M-012498-00 |
| VAPA    | NM_003574 | M-021382-00 |
| VAPB    | NM_004738 | M-017795-00 |
| VAV2    | NM_003371 | M-005199-00 |
| VIL2    | NM_003379 | M-017370-01 |
| WAS     | NM_000377 | M-028294-01 |
| WASF1   | NM_003931 | M-011557-00 |
| WASF2   | NM_006990 | M-012141-00 |
| WASF3   | NM_006646 | M-012301-01 |

<sup>a</sup> Dharmacon product number

<sup>b</sup> Applied Biosystems siRNA ID #

\* siRNA not part of original SMARTpool for primary screen
