# Supplementary material for: RNA Interference and Single Particle Tracking Analysis of Hepatitis C Virus Endocytosis
Source: PLOS journal article supplement (doi:10.1371/journal.ppat.1000702), 2009-12-23
Supplement: S3 (10.1371/journal.ppat.1000702.s003) [file journal.ppat.1000702.s003.pdf › journal.ppat.1000702.s003.pdf]

**SI Table 2. Quantitative real time RT-PCR assays**

| Target   | PCR Primer-Probe Sets <sup>a</sup> |
|----------|------------------------------------|
| CLTCL1   | Hs00233589_m1                      |
| CLTB     | Hs01126328_m1                      |
| HIP1R    | Hs00391321_m1                      |
| HIP1     | Hs00193477_m1                      |
| EPN1     | Hs00203391_m1                      |
| EPN3     | Hs00978957_m1                      |
| CFL1     | Hs00830568_g1                      |
| CDC42    | Hs00741586_mH                      |
| ROCK2    | Hs00178154_m1                      |
| AP2M1    | Hs01037584_m1                      |
| SYT1     | Hs00194572_m1                      |
| HGS      | Hs00610371_m1                      |
| ATP6V0A1 | Hs00193110_m1                      |
| RAB7L1   | Hs00187510_m1                      |
| GAPDH    | 4326317E                           |
| 18S      | 4319413E                           |

<sup>a</sup> Applied Biosystems product no.
